# Supplementary material for: Amniotic membrane-encapsulated chitosan–lecithin nanoparticles promote the regenerative potential of mesenchymal stromal cells and fibroblasts
Source: Royal Society of Chemistry journal article supplement (doi:10.1039/d5na00222b), 2025-01-01
Supplement: d5na00222b1.pdf [file d5na00222b1.pdf]

## Supplementary file. 1

To investigate the cytoprotecting potential of NF-hAM from induced oxidative stress, HSF cells were exposed to H<sub>2</sub>O<sub>2</sub> treatment at a final concentration of 300  $\mu$ M for 12 hours, followed by 48 hours of NF-hAM treatment. Then, we studied their survival by MTT assay (Fig. 1) and resistance to apoptosis induction (Fig. 1). Our analysis demonstrated a significantly higher proliferation rate in the NF-hAM group as compared to H<sub>2</sub>O<sub>2</sub>-treated cells (Fig. 1).

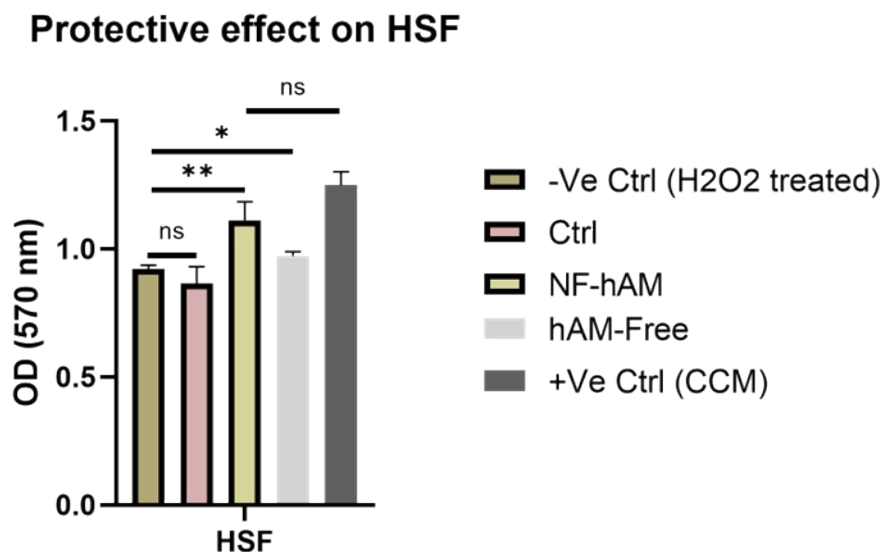

Fig. 1 NF-hAM treatment protects HSF from H<sub>2</sub>O<sub>2</sub> cytotoxicity. MTT assay to investigate HSF proliferative capacity upon H<sub>2</sub>O<sub>2</sub> treatment, followed by NF-hAM treatments.

Table 1: Primer sequence used in RT-qPCR analysis.

| Gene<br>(protein) | Primer  | Sequence (5' to 3')     |
|-------------------|---------|-------------------------|
| $\beta$ -actin    | Forward | CACCATTTGGCAATGAGCGGTTC |
|                   | Reverse | AGGTCTTTGCGGATGTCCACGT  |
| ID 1              | Forward | GCTGTTACTCACGCCTCAA     |
|                   | Reverse | CAACTGAAGGTCCCTGATGTAG  |
| ID2               | Forward | CAAGAAGGTGAGCAAGATGGA   |
|                   | Reverse | GGTGATGCAGGCTGACAATA    |
| VEGFA             | Forward | ATCTGCATGGTGATGTTGGA    |
|                   | Reverse | GGGCAGAATCATCACGAAGT    |
| PDGF              | Forward | GATACTTTGCGCGCACACAC    |
|                   | Reverse | GGTTTTCTCTTTGCAGCGAGG   |
| Ki-67             | Forward | ACGAGACGCCTGGTTACTATC   |

|          |         |                           |
|----------|---------|---------------------------|
| PCNA     | Reverse | GCTCATCAATAACAGACCCATTTAC |
|          | Forward | GGCCGAAGATAACGCGGATAC     |
| Snail    | Reverse | GGCATATACGTGCAAATTCACCA   |
|          | Forward | ACCACTATGCCGCGCTCTT       |
| Vimentin | Reverse | GGTCGTAGGGCTGCTGGAA       |
|          | Forward | TGTCCAAATCGATGTGGATGTTTC  |
|          | Reverse | TTGTACCATTCTTCTGCCTCCTG   |

### Raw data

| Table format:<br>Grouped |       | Group A |       |       | Group B |       |       | Group C     |       |       | Group D |      |      |
|--------------------------|-------|---------|-------|-------|---------|-------|-------|-------------|-------|-------|---------|------|------|
|                          |       | Ctrl    |       |       | NF-hAM  |       |       | NF-free hAM |       |       | hAM     |      |      |
|                          |       | A:1     | A:2   | A:3   | B:1     | B:2   | B:3   | C:1         | C:2   | C:3   | D:1     | D:2  | D:3  |
| 1                        | BMSCs | 0.591   | 0.581 | 0.585 | 0.615   | 0.606 | 0.610 | 0.585       | 0.575 | 0.580 | 0.59    | 0.60 | 0.59 |
| 2                        | HSF   | 0.456   | 0.496 | 0.476 | 0.504   | 0.512 | 0.508 | 0.450       | 0.470 | 0.464 | 0.48    | 0.49 | 0.48 |
| 3                        | AMSCs | 0.540   | 0.586 | 0.594 | 0.764   | 0.775 | 0.700 | 0.610       | 0.661 | 0.670 | 0.69    | 0.68 | 0.69 |
| 4                        | Title |         |       |       |         |       |       |             |       |       |         |      |      |
| 5                        | Title |         |       |       |         |       |       |             |       |       |         |      |      |

**Fig.2 A. raw data for MTT analysis of BMSCs, AMSCs, and HSF under different experimental conditions**

| Table format:<br>Grouped |       | Group A |        |        | Group B |        |        | Group C     |        |        |
|--------------------------|-------|---------|--------|--------|---------|--------|--------|-------------|--------|--------|
|                          |       | Ctrl    |        |        | NF-hAM  |        |        | NF-free hAM |        |        |
|                          |       | A:1     | A:2    | A:3    | B:1     | B:2    | B:3    | C:1         | C:2    | C:3    |
| 1                        | G0-G1 | 59.800  | 61.200 | 63.300 | 61.500  | 62.500 | 62.900 | 57.400      | 56.800 | 57.600 |
| 2                        | S     | 6.680   | 6.370  | 6.180  | 13.500  | 12.200 | 13.100 | 10.400      | 10.900 | 8.430  |
| 3                        | G2-M  | 13.100  | 14.400 | 15.500 | 13.200  | 12.400 | 12.500 | 13.500      | 10.900 | 10.400 |

**Fig. 2C raw data for Bar graphs indicating BMSC population percentages in different cell cycle phases**

| Table format:<br>Grouped |                  | Group A |       |       | Group B |       |       | Group C     |       |       |
|--------------------------|------------------|---------|-------|-------|---------|-------|-------|-------------|-------|-------|
|                          |                  | Ctrl    |       |       | NF-hAM  |       |       | NF-free hAM |       |       |
|                          |                  | A:1     | A:2   | A:3   | B:1     | B:2   | B:3   | C:1         | C:2   | C:3   |
| 1                        | Annexin V + PI - | 1.370   | 1.570 | 1.510 | 0.310   | 0.350 | 0.330 | 0.370       | 0.550 | 0.370 |

| Table format:<br>Grouped |                  | Group A |       |       | Group B |       |       | Group C     |       |       |
|--------------------------|------------------|---------|-------|-------|---------|-------|-------|-------------|-------|-------|
|                          |                  | Ctrl    |       |       | NF-hAM  |       |       | NF-free hAM |       |       |
|                          |                  | A:1     | A:2   | A:3   | B:1     | B:2   | B:3   | C:1         | C:2   | C:3   |
| 1                        | Annexin V + PI + | 3.300   | 3.370 | 3.100 | 1.560   | 1.720 | 1.570 | 1.860       | 1.740 | 1.880 |

  

| Table format:<br>Grouped |                  | Group A |        |        | Group B |        |        | Group C     |        |        |
|--------------------------|------------------|---------|--------|--------|---------|--------|--------|-------------|--------|--------|
|                          |                  | Ctrl    |        |        | NF-hAM  |        |        | NF-free hAM |        |        |
|                          |                  | A:1     | A:2    | A:3    | B:1     | B:2    | B:3    | C:1         | C:2    | C:3    |
| 1                        | Annexin V - PI + | 17.100  | 17.100 | 17.400 | 15.100  | 14.500 | 15.200 | 11.300      | 10.800 | 10.800 |

**Fig.3B, C, and D: apoptosis analysis**

| Table format:<br>XY |          | X     | Group A |       |       | Group B     |       |       |
|---------------------|----------|-------|---------|-------|-------|-------------|-------|-------|
|                     |          | BMSCs | NF-hAM  |       |       | NF-free hAM |       |       |
|                     |          | X     | A:Y1    | A:Y2  | A:Y3  | B:Y1        | B:Y2  | B:Y3  |
| 1                   | Ctrl     |       | 0.138   | 0.135 | 0.150 | 0.138       | 0.135 | 0.136 |
| 2                   | 5 µg/ml  |       | 0.167   | 0.165 | 0.166 | 0.156       | 0.151 | 0.154 |
| 3                   | 50 µg/ml |       | 0.173   | 0.166 | 0.165 | 0.160       | 0.148 | 0.155 |

**Fig. 4B MTT assay for BMSCs treated with NF-hAM for 24 hours**

| Table format:<br>XY |          | X     | Group A |       |       | Group B     |       |       |
|---------------------|----------|-------|---------|-------|-------|-------------|-------|-------|
|                     |          | BMSCs | NF-hAM  |       |       | NF-free hAM |       |       |
|                     |          | X     | A:Y1    | A:Y2  | A:Y3  | B:Y1        | B:Y2  | B:Y3  |
|                     | Ctrl     |       | 0.366   | 0.365 | 0.369 | 0.366       | 0.365 | 0.369 |
|                     | 5 µg/ml  |       | 0.405   | 0.406 | 0.405 | 0.376       | 0.365 | 0.366 |
|                     | 50 µg/ml |       | 0.408   | 0.409 | 0.410 | 0.359       | 0.357 | 0.358 |

**Fig. 4D MTT assay for BMSCs treated with NF-hAM for 48 hours**

| Table format:<br>XY |          | X     | Group A |       |       | Group B     |       |       |
|---------------------|----------|-------|---------|-------|-------|-------------|-------|-------|
|                     |          | BMSCs | NF-hAM  |       |       | NF-free hAM |       |       |
|                     |          | X     | A:Y1    | A:Y2  | A:Y3  | B:Y1        | B:Y2  | B:Y3  |
| 1                   | Ctrl     |       | 0.388   | 0.385 | 0.382 | 0.388       | 0.385 | 0.382 |
| 2                   | 5 µg/ml  |       | 0.412   | 0.416 | 0.414 | 0.384       | 0.388 | 0.385 |
| 3                   | 50 µg/ml |       | 0.423   | 0.426 | 0.425 | 0.383       | 0.397 | 0.390 |

**Fig. 4F MTT assay for BMSCs treated with NF-hAM for 72 hours**

| Table format:<br>XY |          | X   | Group A  |       |       | Group B  |       |       |
|---------------------|----------|-----|----------|-------|-------|----------|-------|-------|
|                     |          | HSF | 24 hours |       |       | 48 hours |       |       |
|                     |          | X   | A:Y1     | A:Y2  | A:Y3  | B:Y1     | B:Y2  | B:Y3  |
| 1                   | Ctrl     |     | 0.263    | 0.257 | 0.251 | 0.376    | 0.369 | 0.373 |
| 2                   | 5 µg/ml  |     | 0.264    | 0.271 | 0.268 | 0.401    | 0.416 | 0.405 |
| 3                   | 10 µg/ml |     | 0.271    | 0.272 | 0.272 | 0.416    | 0.400 | 0.410 |
| 4                   | 50 µg/ml |     | 0.275    | 0.277 | 0.280 | 0.436    | 0.415 | 0.425 |
| 5                   | Title    |     |          |       |       |          |       |       |

**Fig. 4I MTT assay for HSF treated with NF-hAM for 24 and 48 hours**

| Table format:<br>Grouped |                       | Group A |       |       | Group B |       |       | Group C     |       |       |
|--------------------------|-----------------------|---------|-------|-------|---------|-------|-------|-------------|-------|-------|
|                          |                       | Ctrl    |       |       | NF-hAM  |       |       | NF-free hAM |       |       |
|                          |                       | A:1     | A:2   | A:3   | B:1     | B:2   | B:3   | C:1         | C:2   | C:3   |
| 1                        | Glucose concentration | 0.682   | 0.679 | 0.655 | 0.142   | 0.139 | 0.148 | 0.258       | 0.256 | 0.295 |

**Fig. 6A BMSCs glucose consumption**

| Table format:<br>Grouped |                    | Group A |       |       | Group B |       |       | Group C     |       |       |
|--------------------------|--------------------|---------|-------|-------|---------|-------|-------|-------------|-------|-------|
|                          |                    | Ctrl    |       |       | NF-hAM  |       |       | NF-free hAM |       |       |
|                          |                    | A:1     | A:2   | A:3   | B:1     | B:2   | B:3   | C:1         | C:2   | C:3   |
| 1                        | Lactate production | 0.501   | 0.504 | 0.505 | 0.556   | 0.534 | 0.547 | 0.510       | 0.510 | 0.508 |

**Fig. 6B BMSCs lactate production**

| Table format:<br>Grouped |                 | Group A |       |       | Group B |       |       | Group C  |       |       |
|--------------------------|-----------------|---------|-------|-------|---------|-------|-------|----------|-------|-------|
|                          |                 | Ctrl    |       |       | NF-hAM  |       |       | hAM-Free |       |       |
|                          |                 | A:1     | A:2   | A:3   | B:1     | B:2   | B:3   | C:1      | C:2   | C:3   |
| 1                        | H2O2 production | 0.123   | 0.125 | 0.131 | 0.084   | 0.082 | 0.077 | 0.076    | 0.082 | 0.078 |

**Fig. 6C HSF H2O2 production**

| Table format:<br>Grouped |                       | Group A |       |       | Group B |       |       | Group C  |       |       |
|--------------------------|-----------------------|---------|-------|-------|---------|-------|-------|----------|-------|-------|
|                          |                       | Ctrl    |       |       | NF-hAM  |       |       | hAM-Free |       |       |
|                          |                       | A:1     | A:2   | A:3   | B:1     | B:2   | B:3   | C:1      | C:2   | C:3   |
| 1                        | Glucose concentration | 1.443   | 1.462 | 1.363 | 1.117   | 0.955 | 1.181 | 1.308    | 1.083 | 1.206 |

**Fig. 6D HSF glucose consumption**

| Table format:<br>Grouped |                    | Group A |       |       | Group B |       |       | Group C  |       |       |
|--------------------------|--------------------|---------|-------|-------|---------|-------|-------|----------|-------|-------|
|                          |                    | Ctrl    |       |       | NF-hAM  |       |       | hAM-Free |       |       |
|                          |                    | A:1     | A:2   | A:3   | B:1     | B:2   | B:3   | C:1      | C:2   | C:3   |
| 1                        | Lactate production | 0.450   | 0.470 | 0.422 | 0.460   | 0.476 | 0.500 | 0.425    | 0.422 | 0.384 |

**Fig. 6E HSF lactate production**

| Table format:<br>Grouped |                       | Group A |       |       | Group B |       |       | Group C  |       |       |
|--------------------------|-----------------------|---------|-------|-------|---------|-------|-------|----------|-------|-------|
|                          |                       | Ctrl    |       |       | NF-hAM  |       |       | hAM-Free |       |       |
|                          |                       | A:1     | A:2   | A:3   | B:1     | B:2   | B:3   | C:1      | C:2   | C:3   |
| 1                        | Glucose concentration | 2.295   | 2.249 | 2.413 | 1.847   | 1.944 | 2.049 | 2.444    | 2.192 | 2.270 |

**Fig. 6F AMSCs glucose consumption**

| Table format:<br>Grouped |                    | Group A |       |       | Group B |       |       | Group C  |       |       |
|--------------------------|--------------------|---------|-------|-------|---------|-------|-------|----------|-------|-------|
|                          |                    | Ctrl    |       |       | NF-hAM  |       |       | hAM-Free |       |       |
|                          |                    | A:1     | A:2   | A:3   | B:1     | B:2   | B:3   | C:1      | C:2   | C:3   |
| 1                        | Lactate production | 1.286   | 1.412 | 1.446 | 2.056   | 2.060 | 2.182 | 1.499    | 1.152 | 1.236 |

**Fig. 6G AMSCs lactate production**
